# Supplementary material
Source: PubMed Central journal article supplement (PMC3416212)
Supplement: JB.00049-12_zjb999091737so1.pdf [file JB.00049-12_zjb999091737so1.pdf]

**Application of stable isotope peptide mass spectrometry  
to decipher amino acid metabolism in *Dehalococcoides*  
strain CBDB1**

Ernest Marco-Urrea, Jana Seifert, Martin von Bergen, Lorenz Adrian

**Supplementary Information**

FIG. S1. Derivatized amino acids and fragmented species identified by GC-MS. a) Derivatized amino acid; b) fragment  $[M-59]^+$  that contained the entire amino acid after releasing a 59 Da fragment from the carboxy terminus; c) fragment  $[M-87]^+$  that was obtained after a 87 Da fragment with the the carboxylic group of the amino acid was removed from the amino acid; d) fragment  $[f153]^+$  that released the side-chain of the amino acid and the isopropyl group; this fragment contained the C1 and the C2 of the amino acid e) fragment  $[f126]^+$  that was freed after a 87 Da fragment containing the carboxylic group was removed from the carboxy-terminus and the side-chain of the amino acid was removed; this fragment contained only the C2 and the amino group of the amino acid; and f) fragment  $[f139]^+$  which was only found for derivatized glutamine. The fragmentation sites are indicated with red lines.

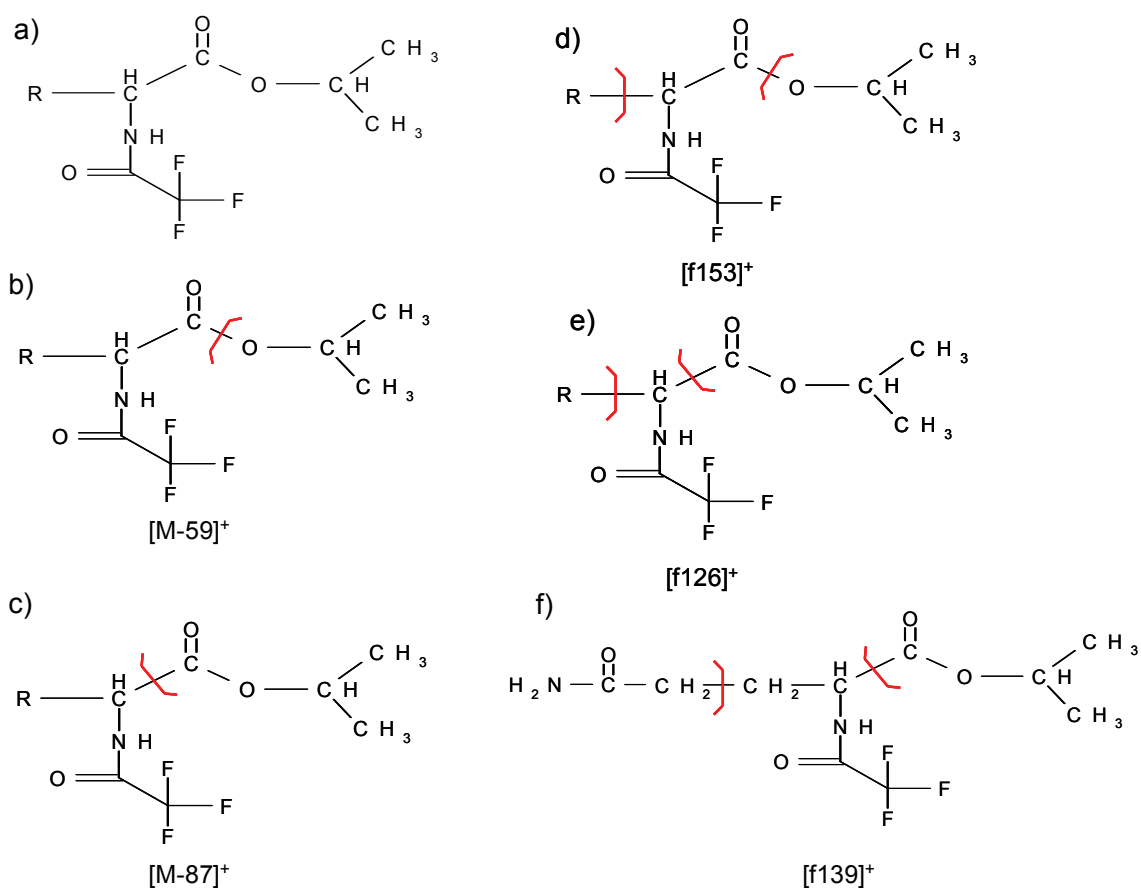

FIG. S2. The pentose phosphate pathway in *Dehalococcoides* CBDB1. Highlighted carbons indicate that they were synthesized from the C1 of acetate (green), the C2 of acetate (red) or from bicarbonate (blue). For the sake of clarity, dotted boxes are used to highlight the transfer of C1/C2 units. Double-headed arrows indicate reversible reactions.

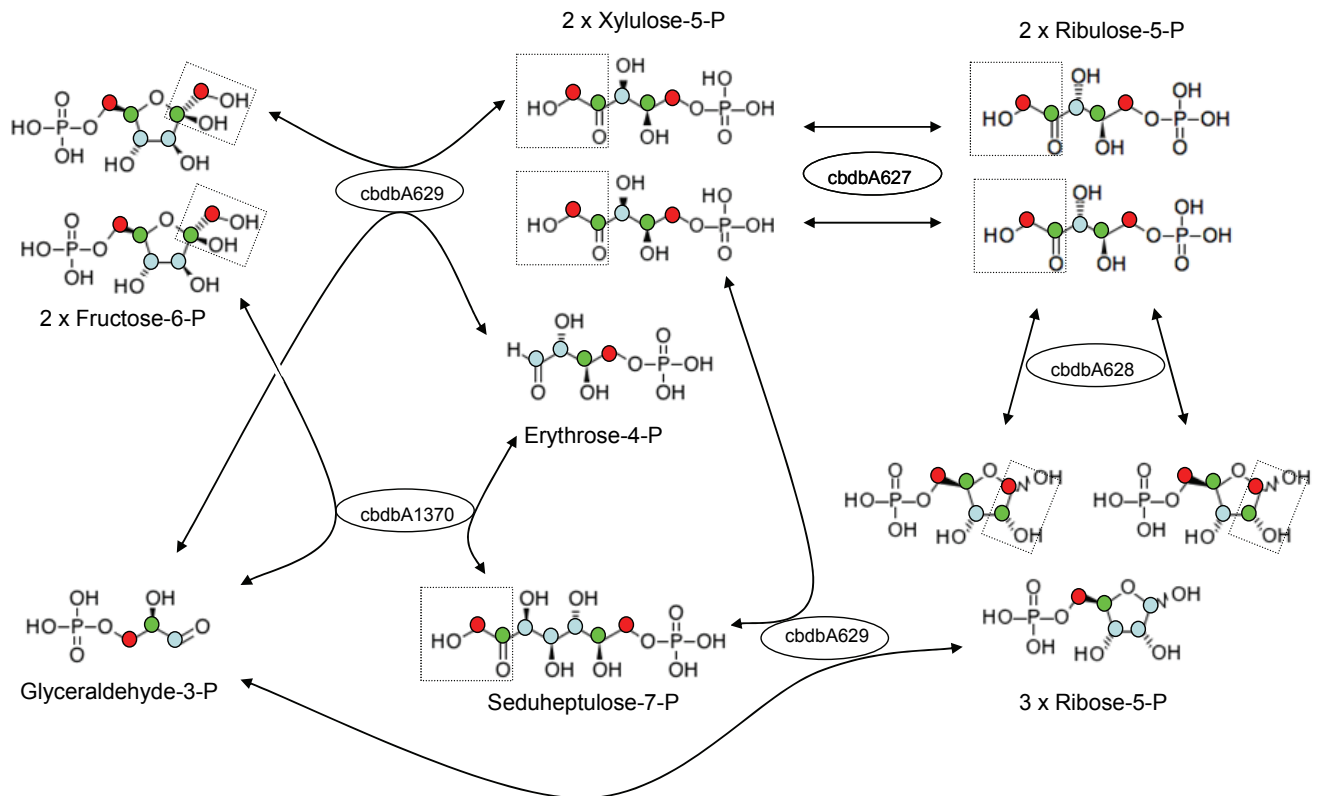

TABLE S1. List of peptides grouped by gi-numbers of the protein from which they are stemming, selected to calculate the specific isotope incorporation from labeled carbon sources into amino acids by peptide mass spectrometry. The experiment was done in triplicate and the selected peptides are shown in replicate 1, 2 and 3, respectively. Abbreviations for amino acids according to the one-letter code.

### Replicate 1

|            |                       |                    |                   |
|------------|-----------------------|--------------------|-------------------|
| gi73748963 | VSVEQLGAEK            |                    |                   |
| gi73749113 | AQIEETESAFDR          | TTIIDGEGSAEAIKDR   | IETVAELLPALEK     |
|            | LEGDEATGVNIVR         | GVDTLANTVR         | GNLNILAVK         |
|            | NIAAGAEPINLK          | VEDALAATR          | GYISAYFVTDPR      |
|            | QQIVQVATITGK          | TTIIDGEGSAEAIKDR   | DGNVIVDK          |
| gi73748309 | ILIGSDLLSETATLLR      | LGLCENETALR        | SIGLNLSGR         |
|            | LVIADTGCLK            | LIADFGLPTNPK       | ASIVCQDETDR       |
| gi73748401 | FLEANFASVLTAIAK       | TAIALDTIINQK       | DALVVYDDLTK       |
| gi73749084 | TTQELSTALQSVGSAVYK    | NQAILNPENTVYSIK    | NVADNLAYNAEK      |
|            | IPAELNTELESK          | VIQGNNEVR          |                   |
| gi73748746 | LEVWDSPNSAGVVIDAVR    | TNAVTSQLDYK        |                   |
| gi73748078 | QWIIQAQNTNPEAGIAR     | LESLLGELDGAK       | ALVIFGSAPGGR      |
| gi73748120 | TEAIASLGATLDNEECYLLSK | SELEVISSLLSR       | TLTNPNCVFQLLK     |
|            | LSWTYSTNPSAADVAK      | ALGIVYLDLSQAR      | SGSEIAFIGGLIK     |
|            | LSTASSLEALAASFGR      | NAPFNQSGGLPFK      | ISSLQQLESPEDLR    |
|            | AGDQSAASLLK           |                    |                   |
| gi73749328 | ANVSGYGNIDR           |                    |                   |
| gi73748484 | INGNIYSINTDLIGR       | LVGVTTYCNYPEAAK    | IVEALEQLAK        |
| gi73748315 | ILDQSALQIVEALER       |                    |                   |
| gi73748444 | AGQQLTDGSINPDILSILGR  | AVVQSDQNVVAR       | LSIQAFEPVLIDGSALR |
| gi73748193 | VFGCGGGGCNAVTR        | VDTLIIPNDR         | TEDELDPVPSFLR     |
| gi73748855 | AACPAANIEGVTLQR       | FLQAYGIDATVPFLAR   | DAAQIASALR        |
| gi73748473 | VIGCGGAGSNAVTR        |                    |                   |
| gi73748913 | LYGAGQDLLCDAFSGNVK    |                    |                   |
| gi73748779 | SDIDLICELLADAK        |                    |                   |
| gi73748310 | SIPFAYFSSLPGVK        | YNLDLAAVPIALK      | TIIGLIGDEK        |
| gi73748490 | VGGYEIGGLAGVILGAAANR  | AISLNNPDAK         |                   |
| gi73748328 | LFFITLPR              |                    |                   |
| gi73748567 | LAGENAAAVAK           |                    |                   |
| gi73748652 | ATSQISQTTLR           | NVLGQSELDILLSQR    |                   |
| gi73748430 | LGDLIAYIAK            | IPSASVSLVDFVGELAR  |                   |
| gi73748429 | ALFLISAPAK            | INELGAEIAR         | SISSVADAVILVENQR  |
| gi73748806 | QGNVATFSPIR           |                    |                   |
| gi73748066 | ADLLAEAYER            |                    |                   |
| gi73748403 | IFNVLGEALDNR          | SLAEQALYPAVDPLANSR | TVLIQELIR         |

## Replicate 2

---

|            |                                                              |                                                      |                                                 |
|------------|--------------------------------------------------------------|------------------------------------------------------|-------------------------------------------------|
| gi73748120 | TDNNTNYSYVNAIK<br>TLTNPNCFVQLLK<br>ALGIVYLDQAR<br>ASNGEPVIDK | SELEVISSLLSR<br>LSTASSLEALAASFGR<br>LSWTYSTNPSAADVAK | SGSEIAFIGGLIK<br>NAPFNQSGGLPFK<br>AADGTVPTITGR  |
| gi73748855 | FLQAYGIDATVPFLAR<br>DVAVGLPPLNQVLAR                          | SDVGGVILGLK<br>IILQNLK                               | AACPAANIEGVTLQR                                 |
| gi73749113 | TTIIDGEGSAEAIK<br>GVDLANTVR<br>IETVAELLPALEK<br>DGVITIEESR   | AQIEETESAFDR<br>VEDALAATR<br>GNLNILAVK               | LEGDEATGVNIVR<br>NIAAGAEPINLK<br>GYISAYFVTDPPGR |
| gi73748484 | LVGVTTYCNYPEAAK                                              | IVEALEQLAK                                           |                                                 |
| gi73748065 | LSEPYCLFLVGCK                                                |                                                      |                                                 |
| gi73748779 | SDIDLICELLADAK                                               |                                                      |                                                 |
| gi73748807 | LAEQCNQFLSK                                                  |                                                      |                                                 |
| gi73749084 | TTQELSTALQSVGSAVYK<br>IPAELNTELESK<br>VIQGNNEVR              | NQAILNPENTVYSIK<br>IIDWLIAEYK                        | NVADNLAYNAEK<br>TALQGNDVEAIK                    |
| gi73748403 | VIDLIAPFAR                                                   | TVLIQELIR                                            |                                                 |
| gi73748567 | AAIYAAEEATAK<br>QTAEVAQSAR                                   | LAGENAAVAK                                           | LATAVDEAGR                                      |
| gi73748343 | TLAENIEAK                                                    | VISLPNAGDIDAR                                        | FDAQTVVEYYSR                                    |
| gi73748915 | LLTEFVSSLPNDK                                                | YLLDVLGVLK                                           |                                                 |
| gi73748263 | DGVEITQDQFFER                                                | LSGTYSIAIQAK                                         |                                                 |
| gi73748309 | NIVGSFYQPR                                                   | ILIGSDLLSETATLLR                                     | LIADFGLPTNPK                                    |
| gi73749328 | ANVSGYGNIDR                                                  |                                                      |                                                 |
| gi73748430 | IPSASVSLVDFVGELAR                                            | AVALVPELK                                            | LGDLIAYIAK                                      |
| gi73748353 | FVVGPPVSDTGFTGR                                              | NLVAAGLADR                                           |                                                 |

## Replicate 3

---

|            |                                    |                                  |                           |
|------------|------------------------------------|----------------------------------|---------------------------|
| gi73748353 | FVVGPPVSDTGFTGR                    | ILVDTYGGFAR                      | ICDQISDAVLDAIIAK          |
| gi73748490 | AISLNNPDAK                         |                                  |                           |
| gi73748650 | AEDCYEVTDLIEDK                     | NAYEIANLIR                       | LGFEDELVR                 |
| gi73748017 | QTFNQAQYDNR                        | LQNLITPEFGPLIR                   |                           |
| gi73749328 | VEPVSGVPVYSDTTTTLK                 | ANVSGYGNIDR                      |                           |
| gi73748064 | DGQGVYGPVEQALIGTK                  | DNDNPFELVR                       |                           |
| gi73748811 | VEEVQQNTVQAVK<br>DSQTAIDKADTTAK    | ASESALLK                         | DNCEAAVGQTK               |
| gi73748963 | VSVEQLGAEK                         |                                  |                           |
| gi73748737 | ANQELIDLQDEIR                      | LADAAITIR                        | VILNPNVPIISR              |
| gi73748309 | SAAIGSSEIFR<br>SIGLNLSGR           | LIADFGLPTNPK<br>LLETNTQAVK       | ILIGSDLLSETATLLR          |
| gi73748193 | VFGCGGGGCNAVTR                     |                                  |                           |
| gi73748278 | NTVPFAENQTANVPAGIR                 |                                  |                           |
| gi73748443 | GEDVLQPGVPESFK                     | VLAAGSTISEDSFK                   | IGAEVGPDDILVGK            |
| gi73748764 | ILDTAEPGDAVGLLLR                   | AYDQIDNAPEEK                     |                           |
| gi73749113 | TTIIDGEGSAEAIKDR<br>TTIIDGEGSAEAIK | WGAPTVIDDGVTIAR<br>LEGDEATGVNIVR | AQIEETESAFDR<br>VEDALAATR |

|            |                       |                       |                       |
|------------|-----------------------|-----------------------|-----------------------|
|            | GVDTLANTVR            | GNLNILAVK             | IETVAELLPALEK         |
|            | NIAAGAEPINLK          | NIAAGAEPINLKR         | QQIVQVATITGK          |
|            | KIETVAELLPALEK        |                       |                       |
| gi73748944 | LSPLALIQK             | QDLDAFIDSSQR          |                       |
| gi73748304 | NNDPFNIQSDQIR         | QNISQSDVNCPDLAASK     |                       |
| gi73749084 | IINEPTAAALAYGLDK      | TTQELSTALQSVGSAVYGK   | GVNPDEVVAIGAAIQAGVLK  |
|            | NQAILNPENTVYSIK       | NVADNLAYNAEK          | IPAEINTELESK          |
|            | VTEAVITVPAYFNDAQR     | VIQGNNEVR             |                       |
| gi73748401 | ELAAFAQFGTSELDK       | GQDIVSIK              |                       |
| gi73748635 | VIVACVEGGR            |                       |                       |
| gi73748855 | VDNIGDLFSCAAILNTSNLPR | GLENLYETPEELAVDVPDPSK | DAAQIASALR            |
|            | ALLEGLSEESSR          | AACPAANIEGVTLQR       |                       |
| gi73749370 | LAANDYFSQFIGR         |                       |                       |
| gi73748779 | SDIDLICELLADAK        | AAFYCPICNNEFVWSAK     |                       |
|            |                       |                       |                       |
| gi73748120 | TLTNPNCVFQLLK         | DGVTSQTEVFLLPTACSYEK  | LSTASSLEALAASFGR      |
|            | LQTLYQGEGSGLNAEAITK   | TDNNTNYSYVNAIK        | LPGYLSAPNEDDTTFAAYASK |
|            | ISSLQLESPEDLR         | SGSEIAFIGGLIK         | LSTASSLEALAASFGR      |
|            | AGDQSAASLLK           | LSWTYSTNPSAADVAK      |                       |
| gi73748452 | SLQNAQFTPGR           | SVCDTCPTIR            |                       |
| gi73748066 | YCQNACPFPIPK          |                       |                       |
| gi73748797 | ILAVEPASCPSLTK        |                       |                       |
| gi73749066 | IIDNACNEDFAR          |                       |                       |
| gi73748634 | TPVICGLAR             |                       |                       |
| gi73748710 | VGLSVCYTGPAAEK        |                       |                       |
| gi73748529 | SESSLSATCPVCSAESTR    |                       |                       |
| gi73748430 | IISNASCTTNCVAPLIK     |                       |                       |
| gi73748065 | LSEPYCLFLVGCK         |                       |                       |
| gi73749289 | TLEFGDVEECVETPR       |                       |                       |
| gi73749091 | ALAGTAGLDCGVSYTADFGK  |                       |                       |
| gi73748637 | LTGAQIVCESLLK         |                       |                       |
| gi73748075 | NLGVSEVNLVCSR         |                       |                       |
| gi73748576 | NAAVIADLVGDNVGDCAGR   |                       |                       |
| gi73748913 | LYGAGQDLLCDAFSGNVK    |                       |                       |
| gi73748594 | AADTGADIVGK           |                       |                       |
| gi73748429 | ALFLISAPAK            |                       |                       |
| gi73749102 | SNAIVLAK              |                       |                       |
| gi73748746 | APGSTADIVK            |                       |                       |
| gi73748877 | FNEFITSK              |                       |                       |
| gi73748567 | LAGENAAAVAK           |                       |                       |
| gi73748327 | NDNVLVIAGK            |                       |                       |

TABLE S2. Number of amino acids identified in peptides of cultures of strain CBDB1 grown with different labeled carbon sources. Numbers are given for all three replicates of each treatment. All amino acids matched with the labeling pattern model given in Table 2 and no differently labeled amino acids were found. The peptides analyzed for each replicate are listed in Table S1. Treatments: 1C: cultures containing 5 mM of [1-<sup>13</sup>C]acetate and 30 mM unlabeled bicarbonate; 2C: cultures with [2-<sup>13</sup>C]acetate and 30 mM unlabeled bicarbonate; Carb: cultures with 5 mM unlabeled acetate and 30 mM [<sup>13</sup>C]bicarbonate.

|        |      | Gly | Ala | Ser | Pro | Val | Thr | Cys | Ile | Leu | Asn | Asp | Gln | Lys | Glu | Phe | Arg | Tyr |
|--------|------|-----|-----|-----|-----|-----|-----|-----|-----|-----|-----|-----|-----|-----|-----|-----|-----|-----|
| Rep. 1 | 1C   | 22  | 46  | 26  | 10  | 16  | 17  | 6   | 19  | 33  | 21  | 18  | 13  | 4   | 24  | 10  | 6   | 8   |
|        | 2C   | 33  | 69  | 35  | 18  | 29  | 29  | 20  | 35  | 34  | 30  | 33  | 21  | 4   | 35  | 15  | 8   | 13  |
|        | Carb | 39  | 74  | 36  | 16  | 41  | 30  | 18  | 42  | 44  | 30  | 33  | 25  | 8   | 44  | 19  | 10  | 9   |
| Rep. 2 | 1C   | 27  | 35  | 20  | 7   | 14  | 13  | 4   | 19  | 28  | 19  | 18  | 8   | 3   | 14  | 7   | 5   | 9   |
|        | 2C   | 22  | 48  | 34  | 11  | 28  | 22  | 2   | 24  | 52  | 20  | 28  | 18  | 5   | 27  | 9   | 6   | 12  |
|        | Carb | 23  | 45  | 20  | 8   | 27  | 23  | 5   | 25  | 49  | 20  | 19  | 16  | 4   | 29  | 6   | 7   | 6   |
| Rep. 3 | 1C   | 12  | 34  | 8   | 9   | 11  | 15  | 3   | 13  | 15  | 19  | 8   | 10  | 4   | 15  | 12  | 6   | 13  |
|        | 2C   | 15  | 31  | 15  | 7   | 18  | 12  | 1   | 13  | 28  | 13  | 11  | 7   | 2   | 16  | 7   | 7   | 8   |
|        | Carb | 15  | 44  | 15  | 11  | 15  | 12  | 1   | 16  | 30  | 19  | 13  | 11  | 4   | 18  | 8   | 8   | 6   |

TABLE S3. Number of labeled amino acids identified in peptides from cultures that were grown with a labeled carbon source and unlabeled amino acids. All identified amino acids had isotopic labeling patterns as shown in Table 2. The peptides analyzed were the same as those shown in Table S1 for replicates 1 and 2. Treatments: 1C: cultures containing 5 mM of [1-<sup>13</sup>C]acetate and 30 mM unlabeled bicarbonate; 2C: cultures with [2-<sup>13</sup>C]acetate and 30 mM unlabeled bicarbonate; Carb: cultures with 5 mM unlabeled acetate and 30 mM [<sup>13</sup>C]bicarbonate.

|           |      | Gly | Ala | Ser | Pro | Val | Thr | Cys | Ile | Leu | Asn | Asp | Gln | Lys | Glu | Phe | Arg | Tyr |
|-----------|------|-----|-----|-----|-----|-----|-----|-----|-----|-----|-----|-----|-----|-----|-----|-----|-----|-----|
| Rep.<br>1 | 1C   | 16  | 33  | 11  | 8   | 10  | 8   | 3   | 9   | 19  | 13  | 10  | 6   | 2   | 11  | 10  | 6   | 9   |
|           | 2C   | 11  | 31  | 23  | 4   | 19  | 14  | 1   | 16  | 42  | 14  | 16  | 10  | 1   | 16  | 6   | 7   | 10  |
|           | Carb | 29  | 58  | 23  | 9   | 27  | 20  | 5   | 25  | 58  | 19  | 22  | 17  | 4   | 33  | 13  | 10  | 4   |
| Rep.<br>2 | 1C   | 9   | 21  | 9   | 3   | 4   | 10  | 2   | 10  | 13  | 7   | 7   | 4   | 0   | 10  | 7   | 4   | 8   |
|           | 2C   | 8   | 22  | 11  | 4   | 11  | 9   | 1   | 5   | 16  | 8   | 7   | 3   | 0   | 7   | 3   | 4   | 6   |
|           | Carb | 11  | 40  | 10  | 4   | 12  | 12  | 1   | 16  | 19  | 15  | 11  | 6   | 2   | 21  | 5   | 6   | 7   |
